# Supplementary material for: Aberrant habit formation in the Sapap3-knockout mouse model of obsessive-compulsive disorder
Source: PubMed Central journal article supplement (PMC6700199; doi:10.1038/s41598-019-48637-9), 2019-08-19
Supplement: 41598_2019_48637_MOESM1_ESM.pdf [file 41598_2019_48637_MOESM1_ESM.pdf]

# Aberrant habit formation in the Sapap3-knockout mouse model of obsessive-compulsive disorder

Lotfi C. Hadjas, Christian Lüscher, and Linda D. Simmler

## Supplementary Information

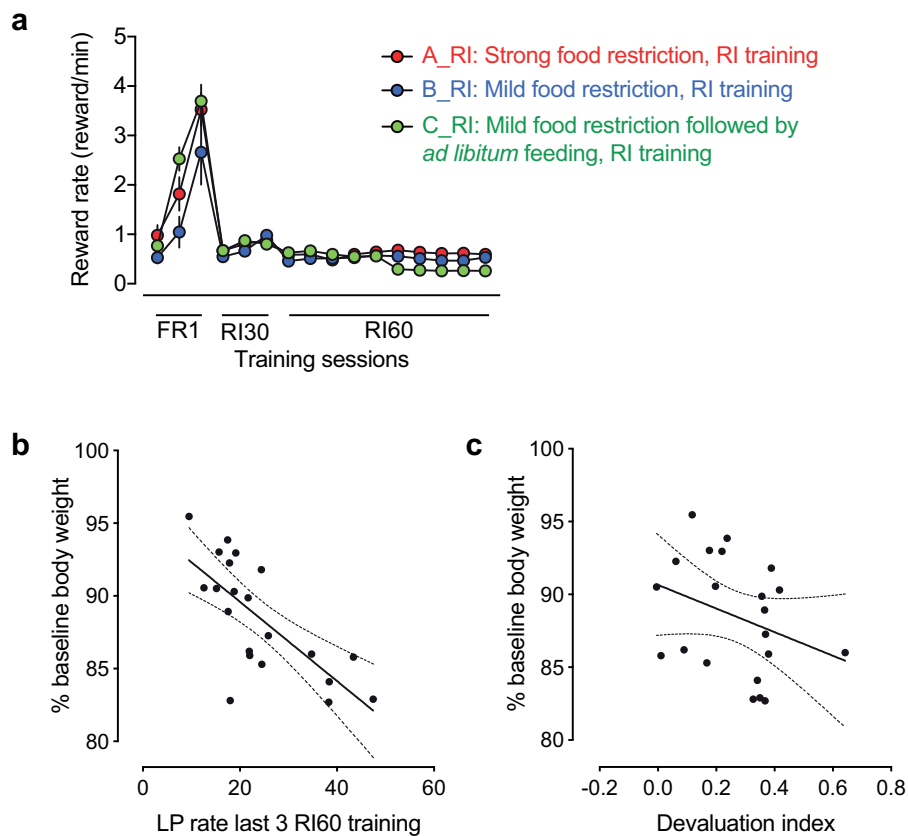

**Supplementary Figure S1. Additional analyses from the habit formation task in WT mice.** (a) Reward rates during FR1 and random interval (RI) training in feeding conditions A (strong food restriction), B (mild food restriction), and C (mild food restriction followed by *ad libitum* feeding). (b) Scatter plot of the reduction of body weight (average from last three training days, expressed as a percentage of baseline before food restriction) vs. lever press

(LP) performance (LP/min) during the last three RI training sessions. Data from cohorts A and B that were trained on an RI schedule were taken into account. Body weight and LP rates during training were significantly correlated (Pearson's  $r = -0.72$ ,  $p < 0.001$ ).  $n = 21$ . **(c)** Scatter plot of the reduction of body weight (same as in B) vs. devaluation index. Data from cohorts A and B that were trained on an RI schedule were taken into account. Body weight and devaluation indices were not correlated (Pearson's  $r = -0.33$ ,  $p = 0.15$ ).  $n = 21$ .
